# Molecular Sites for the Positive Allosteric Modulation of Glycine Receptors by Endocannabinoids

Gonzalo E. Yévenes<sup>1\*</sup>, Hanns Ulrich Zeilhofer<sup>1,2</sup>

<sup>1</sup> Institute of Pharmacology and Toxicology, University of Zurich, Zurich, Switzerland, <sup>2</sup> Institute of Pharmaceutical Sciences, ETH Zurich, Zurich, Switzerland

## Abstract

Glycine receptors (GlyRs) are transmitter-gated anion channels of the Cys-loop superfamily which mediate synaptic inhibition at spinal and selected supraspinal sites. Although they serve pivotal functions in motor control and sensory processing, they have yet to be exploited as drug targets partly because of hitherto limited possibilities for allosteric control. Endocannabinoids (ECs) have recently been characterized as direct allosteric GlyR modulators, but the underlying molecular sites have remained unknown. Here, we show that chemically neutral ECs (e.g. anandamide, AEA) are positive modulators of  $\alpha_1$ ,  $\alpha_2$  and  $\alpha_3$  GlyRs, whereas acidic ECs (e.g. N-arachidonoyl-glycine; NA-Gly) potentiate  $\alpha_1$  GlyRs but inhibit  $\alpha_2$  and  $\alpha_3$ . This subunit-specificity allowed us to identify the underlying molecular sites through analysis of chimeric and mutant receptors. We found that alanine 52 in extracellular loop 2, glycine 254 in transmembrane (TM) region 2 and intracellular lysine 385 determine the positive modulation of  $\alpha_1$  GlyRs by NA-Gly. Successive substitution of non-conserved extracellular and TM residues in  $\alpha_2$  converted NA-Gly-mediated inhibition into potentiation. Conversely, mutation of the conserved lysine within the intracellular loop between TM3 and TM4 attenuated NA-Gly-mediated potentiation of  $\alpha_1$  GlyRs, without affecting inhibition of  $\alpha_2$  and  $\alpha_3$ . Notably, this mutation reduced modulation by AEA of all three GlyRs. These results define molecular sites for allosteric control of GlyRs by ECs and reveal an unrecognized function for the TM3-4 intracellular loop in the allosteric modulation of Cys-loop ion channels. The identification of these sites may help to understand the physiological role of this modulation and facilitate the development of novel therapeutic approaches to diseases such as spasticity, startle disease and possibly chronic pain.

**Citation:** Yévenes GE, Zeilhofer HU (2011) Molecular Sites for the Positive Allosteric Modulation of Glycine Receptors by Endocannabinoids. PLoS ONE 6(8): e23886. doi:10.1371/journal.pone.0023886

**Editor:** Debra Kendall, University of Connecticut, United States of America

**Received:** April 27, 2011; **Accepted:** July 29, 2011; **Published:** August 25, 2011

**Copyright:** © 2011 Yévenes, Zeilhofer. This is an open-access article distributed under the terms of the Creative Commons Attribution License, which permits unrestricted use, distribution, and reproduction in any medium, provided the original author and source are credited.

**Funding:** This work was supported by the Forschungskredit of the University of Zurich and by the Schweizerischer National Fonds (3100A0-116064/1 and 31003A-131093/1). The funders had no role in study design, data collection and analysis, decision to publish, or preparation of the manuscript.

**Competing Interests:** The authors have declared that no competing interests exist.

\* E-mail: yevenes@pharma.uzh.ch

## Introduction

Glycine receptors (GlyRs) are anion-selective transmitter-gated ion channels of the Cys-loop superfamily. They are critical for the control of excitability in the spinal cord, brain stem, and a few select brain areas. Diminished glycinergic inhibition plays a key role in inflammation-induced pain hypersensitivity and in heritable startle disease [1–3]. GlyRs are pentameric complexes composed of  $\alpha$  and  $\beta$  subunits, which can form homomeric ( $\alpha$ ) or heteromeric ( $\alpha\beta$ ) receptors. Each subunit possesses an amino-terminal extracellular domain (ECD), four transmembrane domains (TM) and a large intracellular loop (IL) between TM3 and TM4 [3–4]. Molecular cloning studies have identified four highly conserved  $\alpha$  subunits ( $\alpha_{1-4}$ ), which differ in their developmental and regional expression [4] as well as in their biophysical properties [5–6]. As a consequence, a growing body of evidence suggests specific roles for GlyR isoforms in diverse physiological processes [7–9].

GlyRs are also subject to allosteric modulation by metal ions or small organic compounds including zinc, general anesthetics and ethanol [3,10]. Two well characterized allosteric sites are localized in the TM and ECD regions. Residues within the TM2 and TM3 domains of  $\alpha_1$  GlyRs combine to form a cavity which serves as an ethanol and general anesthetic binding pocket [11–

12], whereas several amino acids in the ECD contribute to the modulation by zinc [13–14]. Interestingly, the GlyR isoforms differ in their sensitivities to these modulators [15–17]. Recent studies have reported that the GlyR activity can be modulated allosterically by certain endocannabinoids (ECs) in a G-protein-independent manner [10,18–20]. ECs are endogenous lipid signaling molecules, structurally related to arachidonic acid, that primarily, but not exclusively, act through G protein-coupled cannabinoid receptors (CB-R) [21]. Interestingly, other putative ECs and their synthetic derivatives, despite being poor CB-R activators, are able to effectively modulate ion channels [22–25]. ECs which modulate GlyRs not only spare GABA<sub>A</sub>-R [19], but also exhibit differential effects on GlyR subtypes [10,20]. Importantly, the sites for the EC modulation of GlyRs have been shown to be different from the TM sites responsible for ethanol modulation [19]. By analyzing different ECs in chimeric and mutant GlyRs, we identified a group of residues that jointly determine the EC sensitivity of GlyR isoforms. These residues are localized along the N-terminal ECD, TM and IL regions and are not related to previously known allosteric sites on GABA<sub>A</sub> or GlyRs. Thus, our results define hitherto unrecognized allosteric sites for ECs on GlyR, which could possibly enable the development of subtype-specific GlyR modulators.

## Results

### Allosteric modulation of GlyR by endocannabinoid derivatives

In a first set of experiments, we examined the sensitivity of the three most abundant GlyR  $\alpha$  subunits ( $\alpha_1$ ,  $\alpha_2$  and  $\alpha_3$ ) to different ECs. Most of these molecules have been identified as ECs or putative ECs from brain or spinal cord extracts [21–22]. We found that low micromolar concentrations of neutral and acidic ECs modulated currents through homomeric GlyRs expressed in HEK 293 cells elicited at low glycine concentrations ( $EC_{10}$ ) (Figure 1, Figure S1). Five of the compounds tested contained free carboxyl groups (NA-Gly, N-arachidonoyl glycine; NA-Ser, N-arachidonoyl-L-serine; NALA, N-arachidonoyl-L-alanine; NA-GABA, N-arachidonoyl-GABA; AA, arachidonic acid) and displayed subunit-specificity. For example, NA-Gly induced a significant potentiation of glycine-activated currents through  $\alpha_1$  GlyRs by  $101 \pm 11\%$  ( $10 \mu\text{M}$ ,  $n = 14$ ), whereas currents through  $\alpha_2$  or  $\alpha_3$  GlyRs were inhibited by  $-56 \pm 5\%$  ( $n = 14$ ) and by  $-32 \pm 3\%$  ( $n = 14$ ) at  $10 \mu\text{M}$ , respectively. On the other hand, the four hydroxylated, neutral compounds (NOLE, noladin ether; AEA, anandamide; NA-5HT, arachidonoyl serotonin; NADA, N-arachidonoyl dopamine) showed consistent positive allosteric modulation of all the GlyR isoforms, suggesting that carboxyl groups were required for the inhibition of  $\alpha_2$  and  $\alpha_3$  GlyRs. Interestingly, the basic EC virodhamine (VIR), which possesses an amino group instead of a hydroxyl or carboxyl group, did not significantly alter the  $\alpha_2$  and  $\alpha_3$  GlyR responses and behaved as a very weak  $\alpha_1$  GlyR modulator (Figure 1A–C). These results suggest that hydroxyl groups on ECs are required for the positive modulation of all three GlyR isoforms, whereas carboxyl groups are structural prerequisites for the inhibition of  $\alpha_2$  and  $\alpha_3$  GlyRs. These findings strongly suggest that the existence of specific molecular sites in the different GlyR isoforms which underlie subunit-specific actions of ECs on the GlyR subtypes.

### Functional screening of endocannabinoid molecular sites on GlyR

We next aimed at determining the molecular mechanisms and elements underlying the differential allosteric modulation of GlyRs by acidic ECs. To this end, we focused on NA-Gly and examined its actions at different glycine concentrations (Figure S2). Interestingly, the potentiation elicited by NA-Gly on  $\alpha_1$  GlyRs at  $EC_{10}$  of glycine was significantly attenuated at a higher glycine concentration ( $EC_{50}$ ), whereas the NA-Gly-induced inhibition of  $\alpha_2$  and  $\alpha_3$  GlyRs remained unaltered. These results suggest that the mechanisms and molecular sites involved in potentiation and inhibition are different and non-conserved between subunits. In order to define the molecular sites involved, we next examined the NA-Gly effects using a set of chimeric and mutant GlyRs. To analyze the importance of TM4 and the IL domains, we first studied a pair of chimeric GlyR constructs in which the regions upstream of the IL between  $\alpha_1$  and  $\alpha_2$  were exchanged (Figure 2A). We found that this exchange did not significantly affect the modulation by NA-Gly (Figure 2B–C). Based on these results, we can conclude that IL and TM4 domains do not significantly contribute to the subunit-specific modulation by NA-Gly.

Next, we evaluated the importance of TM regions upstream from the IL. Previous studies have shown that TM regions of GABA<sub>A</sub> and GlyRs contain critical residues for several allosteric modulators, such as ethanol, general anesthetics and neurosteroids [11–12, 26–27]. Furthermore, very recent evidences have been reported that TM residues are critical for the potentiation of recombinant  $\alpha_1$  GlyRs by  $\Delta^9$ -tetrahydrocannabinol (THC) and cannabidiol, two phytocannabinoids [28–29]. Thus, a rational explanation for the

NA-Gly subunit-specific modulation could arise from differences in TM domain composition. An amino acid sequence alignment of the TM regions of  $\alpha_1$  and  $\alpha_2$  GlyR subunits revealed only 3 non-conserved residues: I240, G254 and S296 in  $\alpha_1$  GlyRs or A247, A261 and A303 in  $\alpha_2$  GlyRs (Figure 3A). To investigate the contribution of these residues, we examined the NA-Gly-induced potentiation of triple, double and single mutant  $\alpha_1$  GlyRs in which these amino acids have been substituted with their  $\alpha_2$  GlyR counterparts. Importantly, these mutated receptors as well as all others described in this study responded normally to glycine application (Table 1). Mutation of these non-conserved amino acids (I240V/G254A/S296A) in  $\alpha_1$  GlyR significantly reduced the GlyR current potentiation by NA-Gly to  $14 \pm 6\%$  ( $10 \mu\text{M}$ ,  $n = 7$ ). Subsequent analyses using single and double mutated  $\alpha_1$  GlyRs demonstrated that the G254A mutation reduced the NA-Gly modulation similarly ( $17 \pm 9\%$ ,  $10 \mu\text{M}$ ,  $n = 8$ ), indicating that G254 is a critical determinant of  $\alpha_1$  GlyR potentiation (Figure 3B–D). At higher agonist concentrations, no differences were found between wild type and G254A  $\alpha_1$  GlyRs. On the other hand, the reverse A261G mutation in  $\alpha_2$  GlyRs significantly attenuated NA-Gly-induced inhibition at low and high glycine concentrations (Figure 3D), indicating a role for this residue in both positive and negative modulation of  $\alpha_1$  and  $\alpha_2$  GlyRs by NA-Gly. However, the fact that this single mutation did not invert the potentiation into inhibition or vice versa on both GlyRs suggests the existence of other molecular sites that determine the final NA-Gly effects.

Many of the key residues involved in the coupling of agonist binding to channel gating are located in the N-terminal ECD. Several electrophysiological and molecular modeling studies have postulated that residues within the loops 2 and 7 of the ECD (terminology established by Brejc and coworkers) [30] are critical for the events that precede channel gating [27]. In addition, recent studies have proposed that the generation of a pre-open conformation of the ion channel is a key determinant to explain the differences between full and partial agonists on GlyRs [31]. Interestingly, a specific residue within the extracellular loop 2 of the  $\alpha_1$  GlyR (A52) has been implicated in the generation of this pre-open conformation [32–33], and furthermore, mutation of this amino acid into its  $\alpha_2$  GlyR counterpart (A52S in human or A52T in rat GlyRs) decreases the sensitivity to the allosteric effects of ethanol [15,17]. Thus, it is possible that this residue may also contribute to the NA-Gly effects on GlyRs and we directly investigated its importance studying the NA-Gly sensitivity of A52T  $\alpha_1$  GlyRs and the reverse T59A  $\alpha_2$  GlyR (Figure 4A). In  $\alpha_1$  GlyRs, we found that this mutation significantly attenuated positive modulation by NA-Gly, whereas the reverse substitution on  $\alpha_2$  GlyRs did not change NA-Gly-induced inhibition (Figure 4B). At a higher glycine concentration, these mutations did not significantly affect the receptor sensitivity to this putative EC (Figure 4B). Therefore, these results indicate that only the positive allosteric modulation elicited by NA-Gly on  $\alpha_1$  GlyRs required the A52 residue. However, these mutations again did not convert the current potentiation into inhibition or vice versa, suggesting that the extracellular and TM domain elements identified here could jointly determine the NA-Gly sensitivity of both GlyR isoforms.

To explore this idea, we studied receptors in which both TM and loop 2 residues were exchanged (Figure 5A–C). These experiments showed that in  $\alpha_2$  GlyRs, the combined reversal T59A/A261G significantly reduced NA-Gly-induced inhibition to  $-4 \pm 6\%$  ( $10 \mu\text{M}$ ,  $n = 10$ ), but still did not change the direction of modulation. Surprisingly, the incorporation of the reversal A303S substitution into this double-mutated GlyR was able to convert NA-Gly from an inhibitor to an allosteric potentiator ( $44 \pm 5\%$ ,  $10 \mu\text{M}$ ,  $n = 10$ ) (Figure 5A–C). At a higher glycine concentration, the NA-Gly-

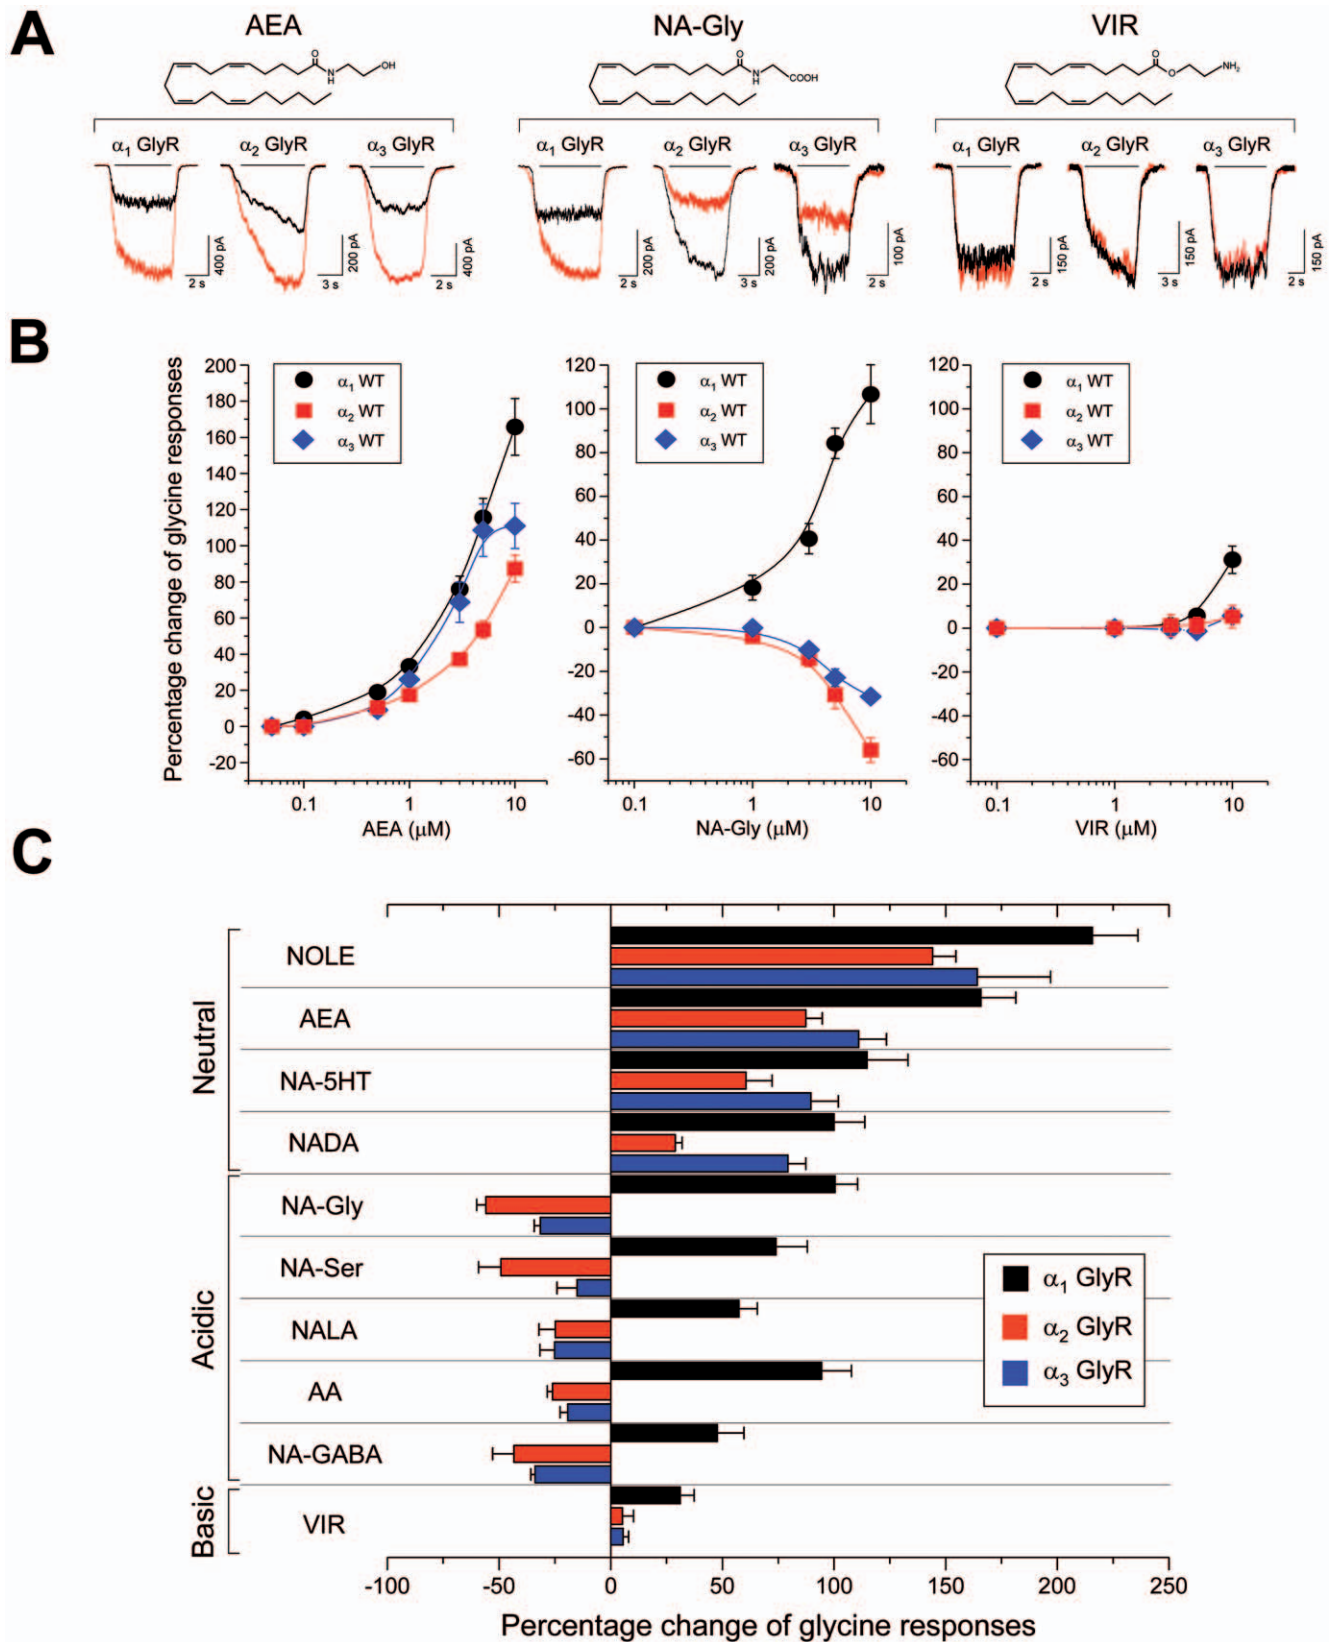

**Figure 1. Modulation of different GlyR subtypes by ECs.** (A) Glycine-activated membrane currents through wild-type  $\alpha_1$ ,  $\alpha_2$  and  $\alpha_3$  GlyRs under control conditions (black) and in the presence of AEA, NA-Gly and VIR (red; all  $10 \mu\text{M}$ ). Membrane currents were activated by equipotent ( $\text{EC}_{10}$ ) glycine concentrations for each particular subunit. Chemical structures for the ligands are also shown. (B) Concentration-response curves. (C) Summary of the EC-mediated allosteric modulation of GlyRs subunits obtained at  $10 \mu\text{M}$  concentration. Note that all acidic ECs tested still potentiated the  $\alpha_1$  GlyR currents, but inhibited currents through  $\alpha_2$ – $\alpha_3$  GlyRs. NOLE, noladin ether; AEA, anandamide; NA-5HT, arachidonyl serotonin;

NADA, N-arachidonyl dopamine, NA-Gly; N-arachidonyl glycine; NA-GABA, N-arachidonyl-GABA; NA-Ser, N-arachidonyl-L-serine; NALA, N-arachidonyl-L-alanine; AA, arachidonic acid; VIR, virodhamine. Data are means  $\pm$  SEM from 6-15 cells.  
doi:10.1371/journal.pone.0023886.g001

induced inhibition on  $\alpha_2$  GlyRs was also significantly attenuated (Figure 5D). On the other hand, 10  $\mu$ M of NA-Gly did not inhibit  $\alpha_1$  GlyRs containing the reverse mutations (A52T/G254A/S296A) at EC<sub>10</sub> of glycine, but showed a partial inhibition at EC<sub>50</sub> (Figure 5C). These results suggest that the potentiating effects of NA-Gly on  $\alpha_1$  GlyRs are mainly determined by the residues A52T/G254A/S296A, whereas the negative effect depends on unidentified molecular determinants only present in  $\alpha_2$ , but not in  $\alpha_1$  GlyRs.

In order to investigate if these molecular determinants can also reverse the inhibitory actions of NA-Gly on  $\alpha_3$  GlyRs, we first performed amino acid sequence alignments of loop 2 and the critical TM regions. These analyses revealed only one residue, on TM2, which was not conserved between  $\alpha_1$  and  $\alpha_3$  GlyRs (G254 in  $\alpha_1$ , A261 in  $\alpha_2$  and A265 in  $\alpha_3$ , Figure 6A). Taking into account the findings described in Figure 5, it seems fair to suggest that the introduction of the point-mutation A265G in  $\alpha_3$  GlyRs should be sufficient to convert the NA-Gly-mediated inhibition into a potentiation. Introduction of the A265G mutation in  $\alpha_3$  GlyR significantly reduced the GlyR current inhibition by NA-Gly ( $-8 \pm 4\%$ , 10  $\mu$ M,  $n=6$ ) but did not convert the inhibition into potentiation (Figure 6B-C). At higher agonist concentrations, this

mutation also significantly attenuated NA-Gly-induced inhibition (Figure 6C), indicating a common role of this residue in the negative modulation of  $\alpha_2$  and  $\alpha_3$  GlyRs at low and high glycine concentrations (see also Figure 3).

These observations demonstrate that residues in extracellular and TM domains jointly determine the positive modulation of  $\alpha_1$  GlyRs by NA-Gly, and suggest that acidic ECs could share similar mechanisms of action on these receptors. On the other hand, the current inhibition induced by NA-Gly appears to be largely determined by the nature of the 2' residue in the TM2 of  $\alpha_2$  and  $\alpha_3$  GlyRs (A261 and A265, respectively). However, all these residues appear dispensable for potentiation by hydroxylated ECs (compare Figure 1). Thus, these results indicate that other residues, possibly conserved between the GlyR isoforms, should be critical for the positive allosteric modulation by neutral ECs.

### A basic intracellular residue is critical for the positive endocannabinoid allosteric modulation of GlyRs

The results presented above suggest that none of the known ECD and TM molecular sites for allosteric modulators are responsible for the positive modulation by hydroxylated ECs on

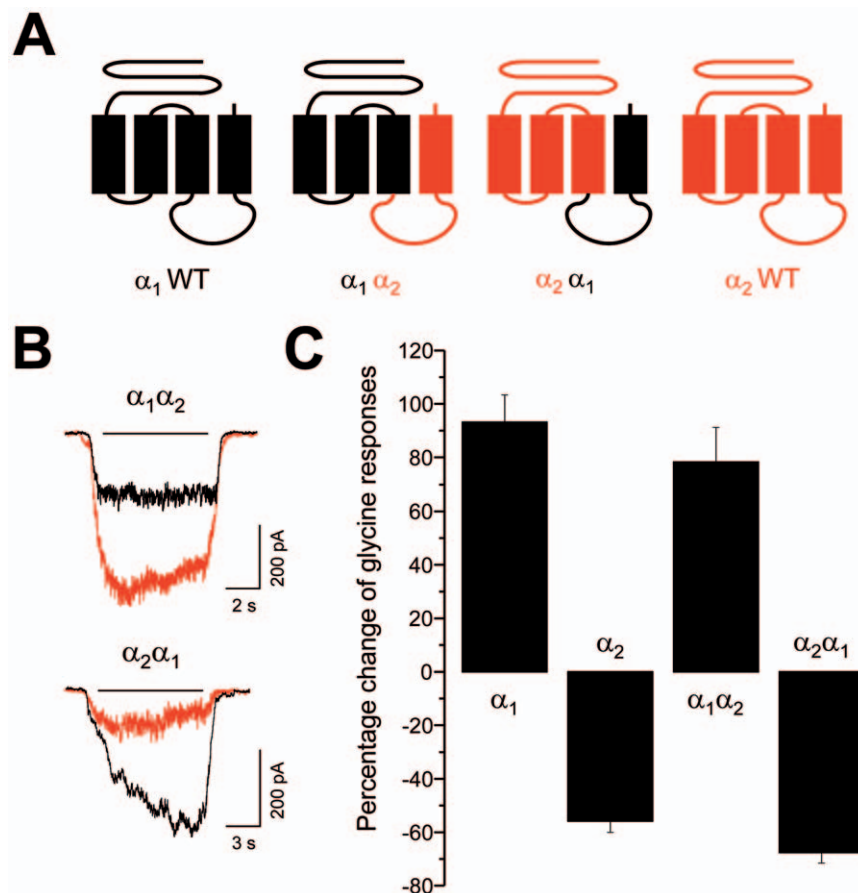

**Figure 2. NA-Gly effects on chimeric GlyR constructs.** (A) Schematic depiction of wild type and chimeric GlyRs. (B) Examples of whole-cell currents recorded from  $\alpha_1\alpha_2$  or  $\alpha_2\alpha_1$  GlyRs before (black) and during the application of NA-Gly (10  $\mu$ M, red). (C) Percent change of the normalized glycinergic membrane currents during the application of NA-Gly (10  $\mu$ M) using equipotent (EC<sub>10</sub>) glycine concentrations. The exchange of the IL between TM3 and TM4 plus the TM4 domain between  $\alpha_1$  and  $\alpha_2$  GlyRs did not significantly influence the NA-Gly-induced modulation.  
doi:10.1371/journal.pone.0023886.g002

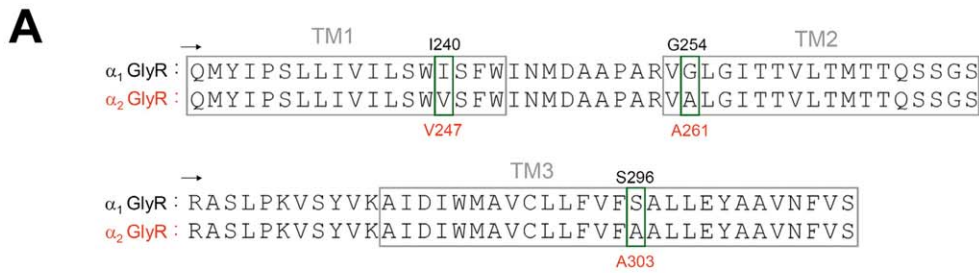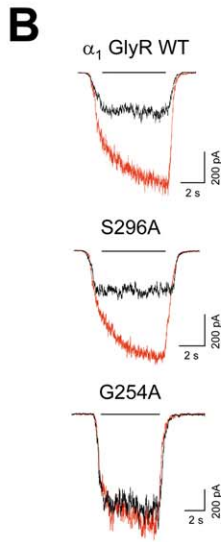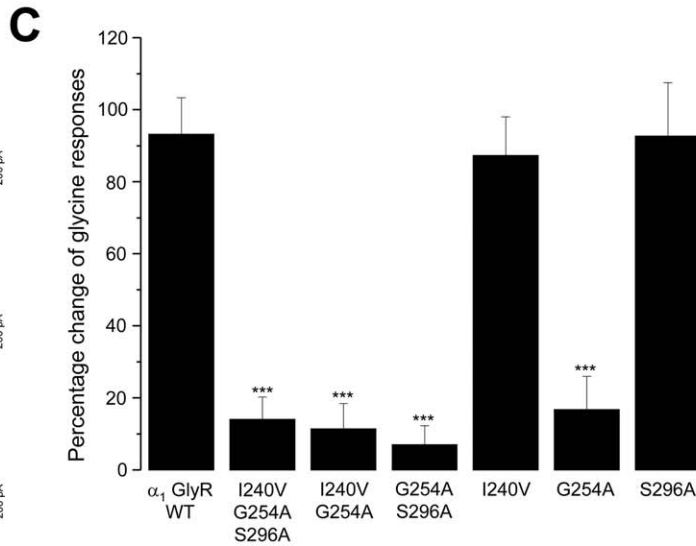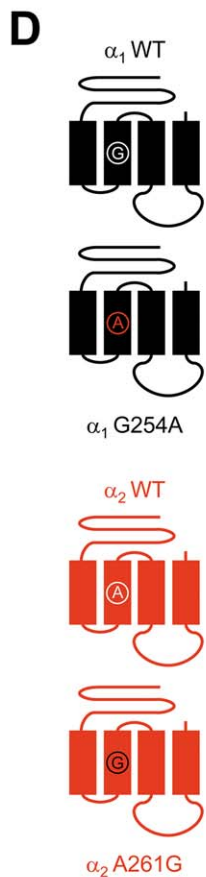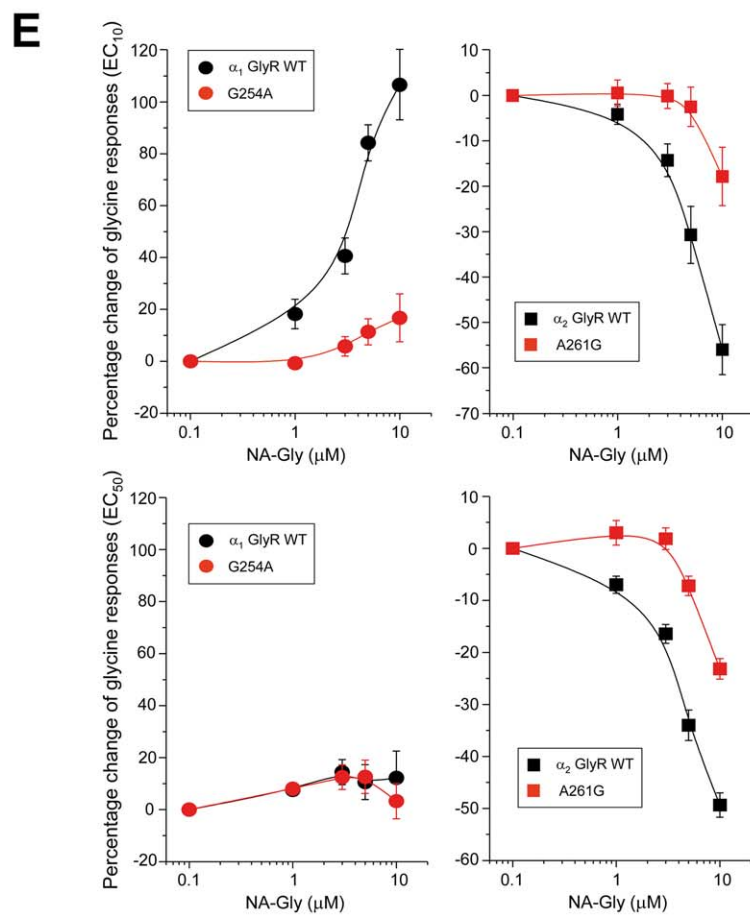

**Figure 3. Positive and negative NA-Gly allosteric effects on  $\alpha_1$  and  $\alpha_2$  GlyRs are influenced by a single TM2 domain residue.** (A) Primary sequence alignment between  $\alpha_1$  and  $\alpha_2$  GlyR subunits from TM1 to TM3 regions. The 3 non-conserved residues are highlighted by green boxes. (B) Examples of current traces through GlyRs with mutated TM domains, in absence (black) or presence of NA-Gly (red) (C) The bar graphs summarizes the normalized glycine-evoked current enhancement after the application of 10  $\mu$ M NA-Gly on  $\alpha_1$  GlyRs with mutations in specific residues within the TM domains (D) Schematic representation of wild-type and TM2-mutated GlyRs (E) Concentration-response curves for NA-Gly in wild-type and TM-mutated  $\alpha_1$  and  $\alpha_2$  GlyRs using two different agonist concentrations. Note that the specific mutation G254A in  $\alpha_1$  GlyRs significantly attenuated the EC potentiation, whereas the reverse TM2 mutation in  $\alpha_2$  GlyRs (A261G) additionally decreased the NA-Gly-induced inhibition. doi:10.1371/journal.pone.0023886.g003

GlyRs. In addition, since AEA effects on GlyRs appear to be different than those TM elements described for ethanol and general anesthetics (S267 in TM2 domain, see ref. [19]), it appears possible that some conserved key residues outside the TM domains are likely to be responsible for the EC effects on GlyRs. Recent studies have explored the role of the large TM3-4 IL for the Cys-loop ion channel function, intracellular regulation and pharmacology. Electrophysiological studies showed that basic residues within the IL of 5-HT<sub>3</sub> receptors are critical determinants of single channel conductance [34], whereas other intracellular basic residues on GlyRs are critical for direct G protein  $\beta\gamma$  interaction with the ion channel [35]. In GlyRs, the same basic residues are required for the allosteric effects of ethanol [36], demonstrating that intracellular residues, besides TM amino acids, can contribute to allosteric modulation of GlyRs. Amino acid sequence alignment of the IL revealed that the most critical lysine residue for G $\beta\gamma$  modulation of  $\alpha_1$  GlyRs is fully conserved between the three GlyR isoforms (K385 in  $\alpha_1$  GlyRs, Figure 7A). Thus, in order to examine if this amino acid plays a role in the modulation by ECs,

we first tested the sensitivity to NA-Gly of K385A mutated GlyRs at EC<sub>10</sub> glycine (Figure 7B–C). Our results show that the intracellular K385A mutation significantly attenuated the potentiation by NA-Gly on  $\alpha_1$  GlyRs to 14 $\pm$ 4% (5  $\mu$ M, n = 8), which is similar to those obtained after mutation of extracellular or TM residues (Figure 3–4). In addition, the homologous intracellular mutations (named K385A relative to  $\alpha_1$  GlyR sequence) did not significantly alter the current inhibition induced by 10  $\mu$ M of NA-Gly on  $\alpha_2$  (–59 $\pm$ 4%, n = 8) or  $\alpha_3$  GlyRs (–40 $\pm$ 4%, n = 7). The mutation of this residue furthermore did not alter the NA-Gly inhibitory effects at higher glycine concentrations, indicating a selective effect on the positive allosteric effects on  $\alpha_1$  GlyRs (Figure 7C). This selectivity was further confirmed in experiments performed in the triple mutated T59A/A261G/A303S  $\alpha_2$  GlyRs, which are potentiated by NA-Gly (Figure 5). In these receptors, the mutation of the conserved basic lysine residue significantly attenuated the NA-Gly potentiation at EC<sub>10</sub> glycine (–1 $\pm$ 5%, 10  $\mu$ M, n = 5, Figure S3) but did not alter the modulation at high glycine concentration (Figure S3).

Because the intracellular lysine residue K385 is conserved between GlyR isoforms and its mutation was able to selectively attenuate the positive allosteric effects of an acidic EC on  $\alpha_1$  GlyRs and on the triple mutated T59A/A261G/A303S  $\alpha_2$  GlyRs, it appears likely that this residue could play a critical role in the potentiation elicited by neutral ECs, which is similar between the three subunits examined (Figure 1). We therefore investigated the effects of two hydroxylated ECs on GlyRs with mutations in the K385 residue (Figure 8A–E). The mutated K385A  $\alpha_1$  GlyR was significantly less potentiated by AEA (14 $\pm$ 3%, n = 8, 5  $\mu$ M). In subsequent experiments we found that the homologous mutations in  $\alpha_2$  and  $\alpha_3$  GlyRs also attenuated AEA-induced potentiation (9 $\pm$ 5%, n = 7 and 19 $\pm$ 5%, n = 6, 5  $\mu$ M, respectively), demonstrating a critical role for this amino acid in the positive modulation by AEA in all three GlyR subtypes (Figure 8E). Further analyses showed that the positive modulation by NA-5HT, a synthetic EC analog [24], was also significantly attenuated in K385A-mutated  $\alpha_1$ ,  $\alpha_2$  and  $\alpha_3$  GlyRs (Figure 8C–E). These data demonstrate that the K385 residue is critical for the positive allosteric modulation of all the GlyR isoforms by both acidic and neutral EC derivatives, but appears to be dispensable for the inhibitory actions of acidic ECs on  $\alpha_2$  and  $\alpha_3$  GlyRs.

## Discussion

Previous studies have identified molecular sites for relevant neuromodulators within GlyRs and GABA<sub>A</sub>R subunits. Molecular sites for ethanol and volatile anesthetics on  $\alpha_1$  GlyR have been localized in the interface between the TM2 and TM3 domains, whereas acceptor sites for zinc have been identified in the ECD [12–14]. Other reports have identified allosteric sites for etomidate and propofol within the TM2-3 domains of  $\beta_2$  and  $\beta_3$  GABA<sub>A</sub>R subunits and critical residues for neurosteroid effects on TM1 and TM4 regions of  $\alpha_1$  GABA<sub>A</sub>Rs [27]. Only very recent studies have addressed sites for several cannabinoid ligands on GlyRs. These studies have shown that specific TM residues (S267 and S296 in  $\alpha_1$  GlyRs) are important for the potentiation elicited by some

**Table 1. Electrophysiological properties of wild-type and mutated GlyRs.**

| Construct                         | EC <sub>50</sub> ( $\mu$ M) | n <sub>H</sub> | I <sub>max</sub> (pA) | n  |
|-----------------------------------|-----------------------------|----------------|-----------------------|----|
| $\alpha_1$ WT                     | 68 $\pm$ 1                  | 2.5 $\pm$ 0.09 | 4113 $\pm$ 491        | 8  |
| $\alpha_2$ WT                     | 120 $\pm$ 6                 | 1.8 $\pm$ 0.15 | 3133 $\pm$ 378        | 7  |
| $\alpha_3$ WT                     | 166 $\pm$ 8                 | 1.9 $\pm$ 0.16 | 1446 $\pm$ 331        | 12 |
| $\alpha_1\alpha_2$                | 86 $\pm$ 3                  | 2.3 $\pm$ 0.14 | 3781 $\pm$ 801        | 5  |
| $\alpha_2\alpha_1$                | 111 $\pm$ 1                 | 2.4 $\pm$ 0.12 | 4442 $\pm$ 845        | 5  |
| $\alpha_1$ I240V/G254A/S296A      | 37 $\pm$ 1*                 | 2.5 $\pm$ 0.11 | 6726 $\pm$ 989        | 5  |
| $\alpha_1$ I240V/G254A            | 32 $\pm$ 2*                 | 1.9 $\pm$ 0.20 | 3447 $\pm$ 666        | 5  |
| $\alpha_1$ G254A/S296A            | 73 $\pm$ 3                  | 1.9 $\pm$ 0.12 | 3343 $\pm$ 990        | 5  |
| $\alpha_1$ I240V                  | 63 $\pm$ 1                  | 2.4 $\pm$ 0.11 | 5285 $\pm$ 787        | 5  |
| $\alpha_1$ G254A                  | 43 $\pm$ 1*                 | 2.5 $\pm$ 0.08 | 5026 $\pm$ 578        | 6  |
| $\alpha_1$ S296A                  | 84 $\pm$ 1                  | 2.2 $\pm$ 0.06 | 4852 $\pm$ 507        | 5  |
| $\alpha_2$ A261G                  | 217 $\pm$ 6*                | 2.1 $\pm$ 0.10 | 3185 $\pm$ 678        | 6  |
| $\alpha_3$ A265G                  | 306 $\pm$ 4*                | 2.3 $\pm$ 0.05 | 1873 $\pm$ 284        | 7  |
| $\alpha_1$ A52T                   | 195 $\pm$ 4*                | 2.2 $\pm$ 0.10 | 5243 $\pm$ 910        | 5  |
| $\alpha_2$ T59A                   | 63 $\pm$ 1*                 | 2.2 $\pm$ 0.05 | 3270 $\pm$ 678        | 5  |
| $\alpha_2$ T59A/A261G             | 76 $\pm$ 2*                 | 2.2 $\pm$ 0.10 | 3628 $\pm$ 1429       | 5  |
| $\alpha_2$ T59A/A261G/A303S       | 102 $\pm$ 2                 | 2.1 $\pm$ 0.08 | 3477 $\pm$ 995        | 5  |
| $\alpha_2$ T59A/A261G/A303S/K385A | 48 $\pm$ 1*                 | 2.2 $\pm$ 0.09 | 4777 $\pm$ 1331       | 6  |
| $\alpha_1$ A52T/G254A/S296A       | 103 $\pm$ 4*                | 2.1 $\pm$ 0.15 | 4957 $\pm$ 1214       | 6  |
| $\alpha_1$ K385A                  | 43 $\pm$ 3*                 | 2.2 $\pm$ 0.24 | 3474 $\pm$ 505        | 8  |
| $\alpha_2$ K385A                  | 76 $\pm$ 2*                 | 1.6 $\pm$ 0.07 | 3409 $\pm$ 569        | 8  |
| $\alpha_3$ K385A                  | 107 $\pm$ 3*                | 2.5 $\pm$ 0.12 | 2064 $\pm$ 575        | 7  |

Values are indicated as mean  $\pm$  s.e.m. from the indicated number of cells. \*indicates significant difference (P<0.05, ANOVA) against the corresponding wild type GlyR subtype.

doi:10.1371/journal.pone.0023886.t001

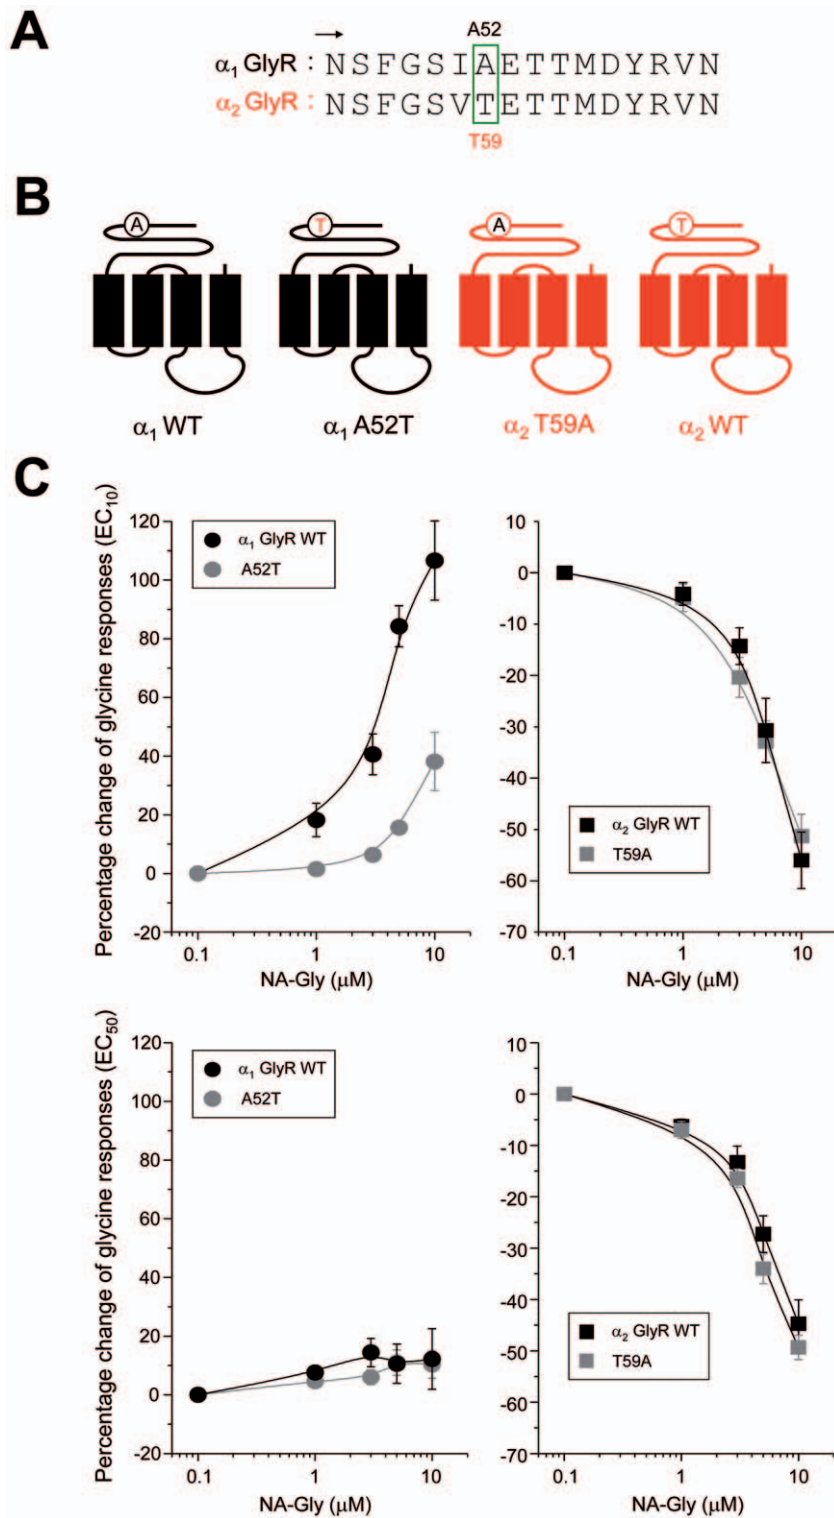

**Figure 4. The composition of extracellular loop 2 influences the NA-Gly-induced potentiation of  $\alpha_1$  GlyRs.** (A) Amino acid sequence alignment between  $\alpha_1$  and  $\alpha_2$  GlyRs within the extracellular loop 2. The A52 residue in  $\alpha_1$  GlyRs and their homologous position in  $\alpha_2$  GlyRs are highlighted by a green box. (B) Schematic depictions of GlyRs with point mutations in the extracellular loop 2. (C) Concentration-response curves for NA-Gly in wild-type and extracellular loop 2-mutated  $\alpha_1$  and  $\alpha_2$  GlyRs using two different agonist concentrations. The mutation A52T significantly attenuated the NA-Gly sensitivity of  $\alpha_1$  GlyRs, whereas the reverse mutation in  $\alpha_2$  GlyRs (T59A) did not alter NAGly-induced inhibition. doi:10.1371/journal.pone.0023886.g004

phytocannabinoids (e.g.  $\Delta^9$ -tetrahydrocannabinol (THC) or cannabinodiol) on GlyRs [10,28–29]. Whether these molecular sites affect the cannabinoids actions by interfering with allosteric

mechanisms or by affecting their binding is still a matter of debate. Mutations to the S267 residue in  $\alpha_1$  GlyRs affect the actions of several other allosteric modulators probably by altering their

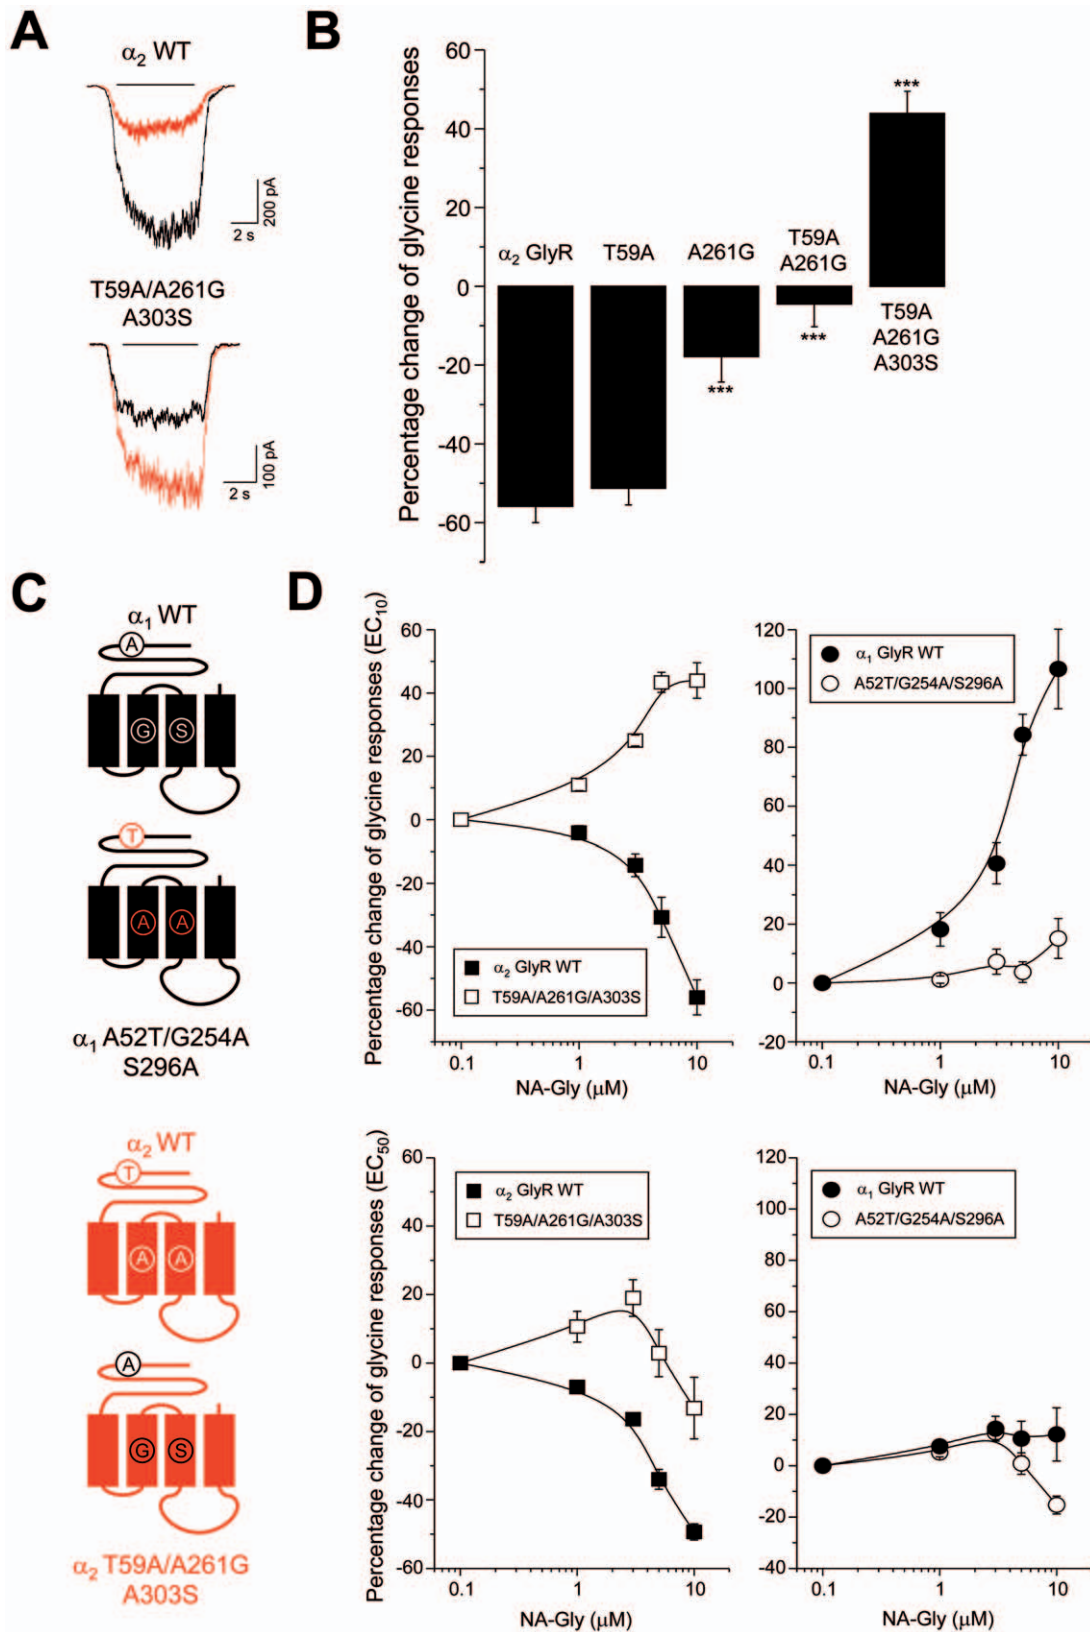

**Figure 5. Selective extracellular loop 2 and TM domain mutations in  $\alpha_2$  GlyRs convert NA-Gly into an allosteric potentiator.** (A) Examples of glycine-activated current traces from wild-type  $\alpha_1$  and mutant  $\alpha_2$  T59A/A261G/A303S GlyRs in the presence of NA-Gly (in red) (B) Summary of the effects of NA-Gly after simultaneous extracellular loop 2 and TM reverse mutations on  $\alpha_2$  GlyRs (\*\*\*)  $P < 0.001$ , vs  $\alpha_2$  GlyRs) (C) Schematic diagrams of the triple mutated  $\alpha_1$  and  $\alpha_2$  GlyRs (D) Sensitivity of the normalized glycine-activated currents elicited in wild-type and triple mutated GlyRs to different concentrations of NA-Gly. Note that three simultaneous reverse mutations in  $\alpha_2$  GlyR converted NA-Gly into an allosteric potentiator, whereas the homologous substitutions within  $\alpha_1$  GlyR still did not produce a significant inhibition. doi:10.1371/journal.pone.0023886.g005



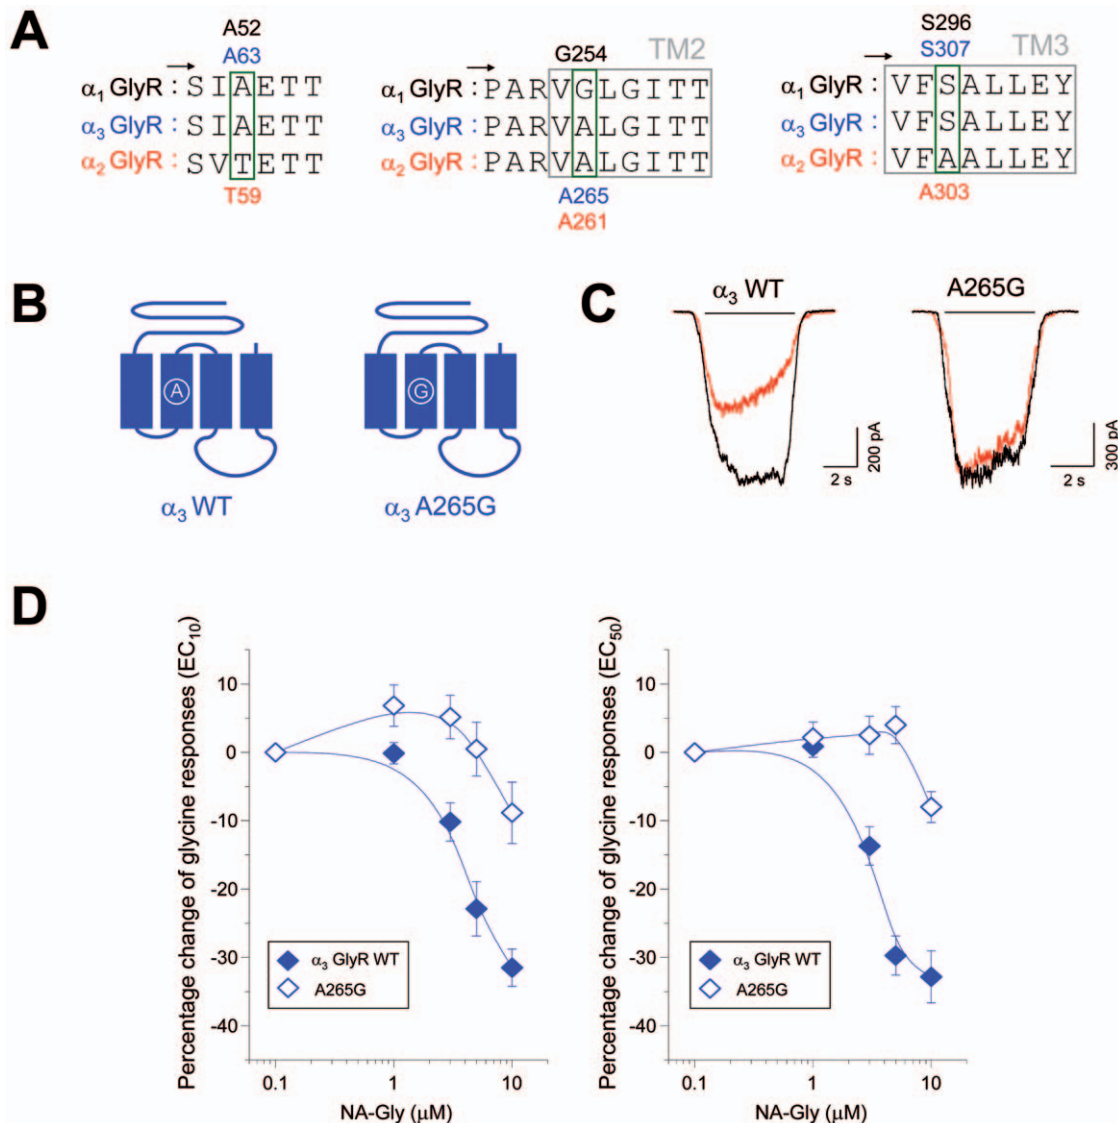

**Figure 6. The negative allosteric effects of NA-Gly on  $\alpha_3$  GlyRs were attenuated but not reverted by altering the TM2 domain composition.** (A) Primary sequence alignment of  $\alpha_1$ ,  $\alpha_2$  and  $\alpha_3$  GlyR subunits in selected extracellular loop 2, TM2 and TM3 segments (B) Schematic depiction of wild type and point mutated  $\alpha_3$  GlyRs. (C) Examples of current traces through wild-type and point-mutated  $\alpha_3$  GlyRs in absence (black) or presence of NA-Gly (10  $\mu$ M, red) (D) Concentration-response curves for NA-Gly in wild-type and TM2-mutated  $\alpha_3$  GlyRs using two different glycine concentrations. Note that this specific mutation A265G in  $\alpha_3$  GlyRs significantly attenuated the NA-Gly-induced inhibition, but did not convert the inhibition into potentiation

doi:10.1371/journal.pone.0023886.g006

binding [10–12,27]. The importance of this residue for the cannabinoid modulation has been addressed by two groups with conflicting results. While the mutation S267I abolishes the potentiation by cannabidiol and HU210 [28], the S267Q substitution did not change the current enhancement induced by THC or AEA [19]. In this context, the role of the S296 residue in  $\alpha_1$  GlyRs appears more specific. It has been recently characterized as a pivotal element for THC binding, and furthermore, its mutation did not alter the GlyR sensitivity to other allosteric modulators, such as propofol [29]. In the present study, we have identified residues in the GlyR critical for the positive and negative allosteric modulation by ECs (summarized in Figure 9).

Electrophysiological studies on different wild-type GlyR subtypes identified distinct actions of different ECs, supporting the idea that determinants present on the EC chemical structures plus

the existence of specific acceptor sites determine the final allosteric effects [10,20,29]. Our results with mutated GlyRs support a role for the A52 and G254 residues in the potentiation of  $\alpha_1$  GlyRs by acidic ECs. Our finding that successive reverse mutations on the non-conserved extracellular loop 2 and TM residues in  $\alpha_2$  GlyRs converted the inhibitory effect of NA-Gly into potentiation further supports the idea that the extracellular loop 2 and TM residues are essential elements for the positive allosteric effects of acidic ECs. These results however should be interpreted with some caution. The presence of equivalent loop 2 and TM compositions in  $\alpha_3$  GlyRs significantly attenuated the NA-Gly inhibitory effect, but did not turn the NA-Gly inhibition into potentiation. In addition, our experiments with mutated  $\alpha_1$  GlyRs did not show any significant NA-Gly-induced inhibition. Our results thus suggest that the positive and negative actions of acidic ECs on different

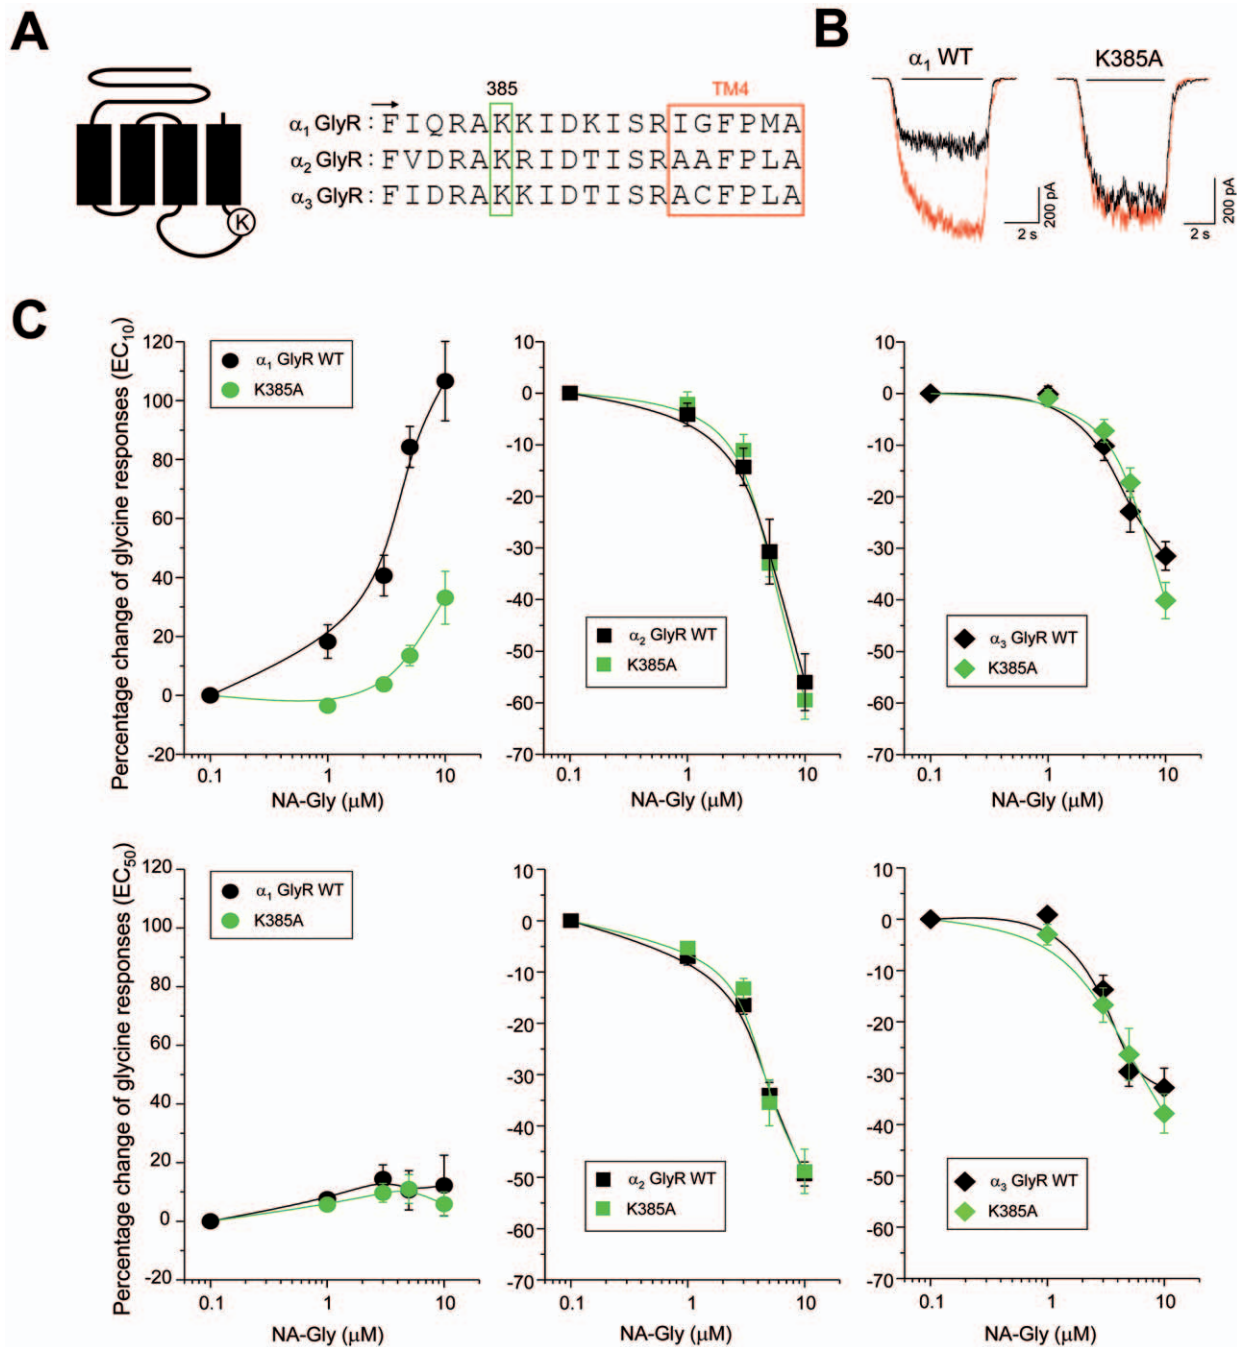

**Figure 7. The positive allosteric modulation elicited by NA-Gly is influenced by a conserved lysine residue within the  $\alpha_1$  GlyR large intracellular loop.** (A) The schematic receptor representation and the primary sequence alignment describe the position of the conserved intracellular K385 residue within the GlyR structure (B) Glycine-activated current traces from wild-type or K385A-mutated  $\alpha_1$  GlyRs before (black) and during the application of NA-Gly (5  $\mu$ M, red) (C) Concentration-response curves for NA-Gly obtained from wild-type and K385-mutated GlyRs. The intracellular mutation significantly attenuated the NA-Gly-induced potentiation of  $\alpha_1$  GlyRs. doi:10.1371/journal.pone.0023886.g007

GlyR subunits are determined by the combination of several molecular sites in each GlyR subunit. Despite the fact that some of these sites are still not identified, it is plausible that the NA-Gly induced inhibition of  $\alpha_2$  and  $\alpha_3$  GlyRs occurs through similar mechanisms and molecular sites.

The residues identified in our experiments could affect the acidic EC modulation of GlyRs through different mechanisms. The extracellular loop 2 residue may influence the EC effects by

altering the ion channel conformation during pre-open states [31–33], whereas the TM residues could either alter putative binding sites [12,29] or affect the ion channel gating [3–5]. Regarding these two TM residues, our data show that only the TM residue at position 2' within the TM2 helix (G254 on  $\alpha_1$  GlyR, A261 on  $\alpha_2$  GlyR, and A265 on  $\alpha_3$  GlyR) was involved in both NA-Gly-induced potentiation and inhibition. Conversely, the non-conserved TM3 residue (S296 on  $\alpha_1$  GlyR, A303 on  $\alpha_2$  GlyR, and

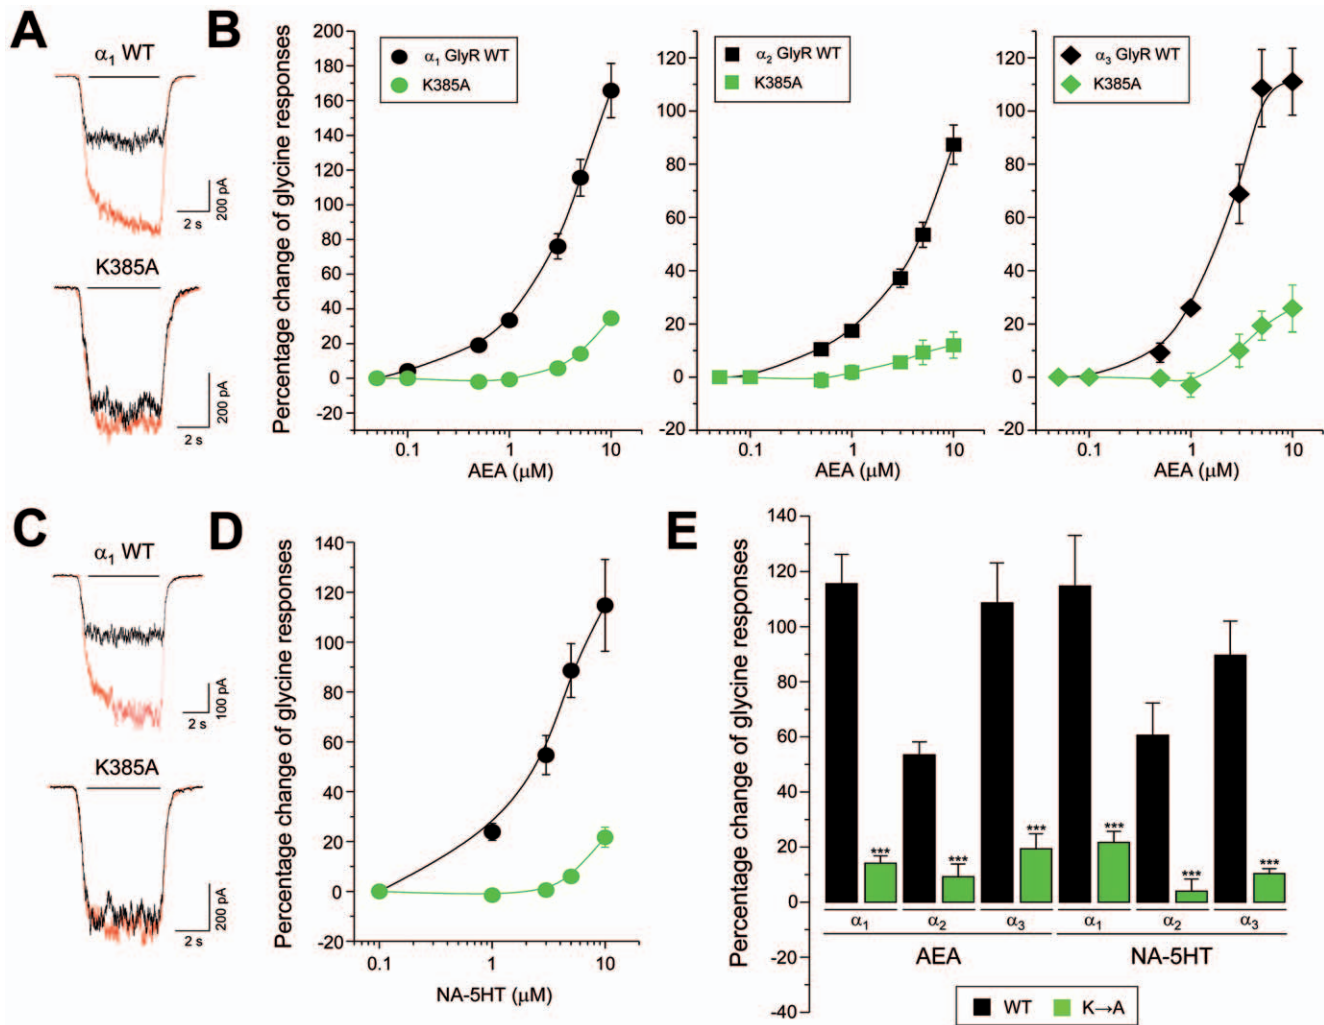

**Figure 8. A conserved intracellular lysine residue determines the positive allosteric modulation by neutral ECs on GlyRs.** (A) Examples of current traces through wild-type  $\alpha_1$  GlyRs and K385A mutated GlyRs in absence (black) or presence of AEA (5  $\mu$ M, red) (B) Sensitivity to AEA of the normalized glycine-activated currents in wild-type and K385A-mutated GlyRs. The intracellular mutation effectively attenuated the AEA-induced modulation of the three GlyR subunits. (C) Glycine-activated current traces from wild-type or K385A-mutated  $\alpha_1$  GlyRs before (black) and during the application of NA-5HT (5  $\mu$ M, red) (D) Concentration-response curves for NA-5HT obtained from wild-type and K385-mutated  $\alpha_1$  GlyRs (E) Summary of the allosteric effects elicited by AEA and NA-5HT in wild-type and K385A-mutated GlyRs. The current potentiation was significantly attenuated by the intracellular mutation. \*\*\*,  $P < 0.001$  between each wild-type GlyR and its corresponding K385A mutant. doi:10.1371/journal.pone.0023886.g008

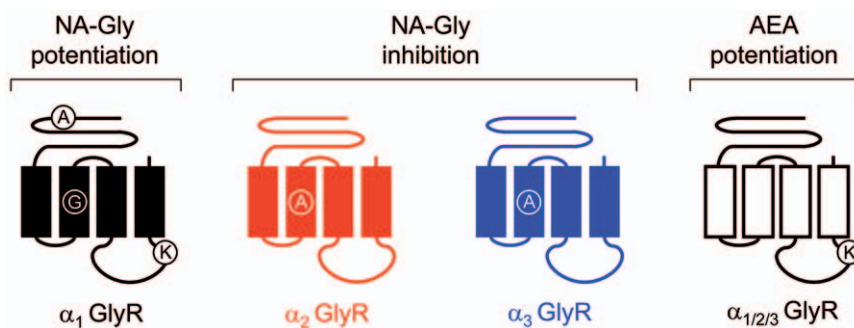

**Figure 9. Molecular sites for the allosteric modulation of different GlyR subtypes by ECs.** The schematic diagram summarizes the molecular sites for the allosteric modulation of GlyRs by acidic and neutral ECs. The inhibition of  $\alpha_2$  and  $\alpha_3$  GlyRs elicited by NA-Gly was specifically influenced by a single TM2 residue (A261 in  $\alpha_2$  GlyRs and A265 in  $\alpha_3$  GlyRs), whereas the NA-Gly-induced potentiation of  $\alpha_1$  GlyRs was reduced by mutating loop 2 (A52), TM2 (G254) or intracellular (K385) amino acids. On the other hand, the AEA-induced potentiation of these three GlyR subtypes was reduced by mutating a conserved intracellular lysine residue (K385 in  $\alpha_1$  GlyRs). doi:10.1371/journal.pone.0023886.g009

A307 on  $\alpha_3$  GlyR) did not influence NA-Gly potentiation on  $\alpha_1$  GlyRs but was necessary to switch the NA-Gly inhibition into potentiation on  $\alpha_2$  GlyRs. Thus, these findings suggest that the 2' residue is essential for the allosteric mechanism or for the binding of NA-Gly to the receptor structure, while the TM3 residue likely participates in the allosteric mechanism required for NA-Gly potentiation exclusively on  $\alpha_2$  GlyRs. Interestingly, a recent report proposed a role for S296 on  $\alpha_1$  GlyR and A307 on  $\alpha_3$  GlyRs in the direct binding of THC to TM3 domains possibly via hydrogen bond interactions [29]. Whether the mutations analyzed in our studies preferentially alter acidic EC binding sites or the allosteric mechanisms involved is at present uncertain. However, our results appear to support the fact that part of the positive and negative NA-Gly effects occur in the TM2 region close to the intracellular vicinity of the ion channel pore, whereas loop 2 may regulate these functional modulations through allosteric effects associated to pre-open states of the ion channel.

On the other hand, our results analyzing the potentiation elicited by neutral ECs on GlyRs showed that the non-conserved TM2 and TM3 amino acids between the GlyRs are essentially dispensable. In this context, the pivotal role of the conserved intracellular K385 residue for the positive allosteric effects of both acidic and neutral ECs supports the idea that this residue is essential for the allosteric mechanism behind the GlyR potentiation by ECs. The unchanged NA-Gly-induced inhibition displayed by  $\alpha_2$  and  $\alpha_3$  K385A mutants and the lack of inhibition displayed by the reverse  $\alpha_1$  mutants also suggests that the sites for the positive and negative effects of acidic ECs on GlyRs are different. Based on these results, we propose that the positive EC allosteric site appears to be present in all three GlyR subtypes and is likely to lie in the region between the IL and the TM4 domain in close contact with the lipid-water interface. In contrast, the inhibitory action of acidic ECs appears to be linked related to TM elements present exclusively on  $\alpha_2$  and  $\alpha_3$  isoforms and apparently exerts dominance over the positive allosteric site on these GlyR subunits. Together with data from previous studies [3–4,11–13,27], our data suggest that the putative molecular sites for ECs on GlyRs are distinct from previously identified allosteric sites for on GABA<sub>A</sub> and GlyRs. In addition, our results indicate that the putative molecular TM sites for THC derivatives [28–29] and the EC sites on GlyRs are essentially different and apparently unrelated.

There is a large body of evidence to suggest that ECs can elicit CB-R independent actions on ion channels [37]. The Cys-loop family is a particularly well characterized target of ECs [38]. Although our results challenge previous reports in some respects [18,20], they strongly support the main conclusion of previous reports that ECs may constitute a family of endogenous GlyR modulators with potential impact on the control of neuronal excitability. Our findings on the subunit selectivity and the molecular sites involved provide additional important insights. First, the critical role of the intracellular lysine residue suggests that these effects can be fine tuned by intracellular signaling or post-translational modifications. Intracellular events such as G protein activation [35–36], ubiquitination [39–40], changes in membrane composition or interactions with accessory proteins may influence the sensitivity of the GlyR subtypes to ECs. Thus, these intracellular events likely contribute to the variability observed in the EC effects on GlyRs. Second, the presence of a modulatory site on the IL matches the intracellular accumulation of ECs reported by others [41]. Several ECs are produced in areas where GlyRs are expressed and their levels also appear to be altered during pathological states, such as spinal cord injury [22,42–44]. Thus, the EC-GlyR interaction could represent a relevant mechanism for

the control of inhibitory glycinergic transmission in the spinal cord during pathological conditions, such as chronic pain. Third, the basic character of the key lysine residue and the structure-activity relationship of ECs on GlyRs suggest that the head groups of the hydroxylated and acidic ECs could directly interact with the K385 amino acid. Interestingly, recent studies have highlighted the interaction of TM4 domain with anionic and neutral lipids in other pentameric ligand-gated ion channels [45–46]. Moreover, ECs likely acquire an extended conformation in the lipid bilayer with their polar group in close proximity to the membrane phospholipid head groups and the water-lipid interface [47]. Although the data presented here does not provide direct proof, together with the aforementioned reports, we can hypothesize that the lipid surrounded surface of TM4 domains could act as an acceptor of the EC alkyl chains, whereas the IL region that contains the K385 residue could configure the interaction zone with the EC head groups *via* non-covalent interactions. Predicting whether these residues are also directly involved in EC binding is extremely difficult in the absence of crystal structures for GlyRs. It will therefore be interesting to further map the residues within TM4 and IL that may influence the EC allosteric modulation of GlyRs.

In summary, our results provide previously unrecognized molecular sites for the allosteric interaction of ECs with GlyRs. The specific contribution of this interaction to physiology and pathology may in the future become accessible through the generation of gene-targeted mice carrying mutations in the molecular sites identified in the present study. A very recent study has suggested that the positive allosteric modulation exerted by THC on GlyRs is highly relevant for cannabinoid-induced analgesia in animal models of pain, suggesting that several other cannabinoid ligands could represent a promising strategy to develop new pain therapeutics [29]. Thus, a more precise knowledge of the EC sites on GlyRs may in addition provide additional rational basis for the development of novel analgesic drugs acting at specific GlyR subtypes.

## Materials and Methods

### Cell Culture and Transfection

HEK 293 cells (CRL-1573; American Type Culture Collection, Manassas, VA, USA) were cultured using standard methods and were transfected using Lipofectamine LTX (Invitrogen, Carlsbad, CA, USA) with 2  $\mu$ g of DNA for each GlyR and 0.5  $\mu$ g of EGFP. Expression of EGFP was used as a marker of successfully transfected cells. All recordings were made 18–36 hours after transfection.

### Electrophysiology

Glycine-evoked currents were recorded from transfected HEK 293 cells in the whole-cell voltage-clamp configuration at room temperature (20–24°C) at a holding potential of –60 mV. Patch electrodes were pulled from borosilicate glass and were filled with (in mM): 120 CsCl, 10 EGTA, 10 HEPES (pH 7.4), 4 MgCl<sub>2</sub>, 0.5 GTP and 2 ATP. The external solution contained (in mM) 150 NaCl, 10 KCl, 2.0 CaCl<sub>2</sub>, 1.0 MgCl<sub>2</sub>, 10 HEPES (pH 7.4), and 10 glucose. Recordings were performed with a HEKA EPC-7 amplifier and Patch Master v2.11 software (HEKA Elektronik, Lambrecht-Pfalz, Germany). The amplitude of the glycine current was obtained using a manually applied pulse (3–6 s) of a saturating glycine concentration (EC<sub>10</sub> or EC<sub>50</sub>) for each GlyR subunit, using an outlet tube (200  $\mu$ m ID) of a custom-designed gravity-fed microperfusion system positioned 50–120  $\mu$ m of the recorded cell. EC<sub>10</sub> or EC<sub>50</sub> values for each GlyR studied were

obtained experimentally after successive application of 1, 10, 30, 60, 100, 200, 500 and 1000  $\mu\text{M}$  glycine (Table 1). The concentration-response curves parameters ( $\text{EC}_{50}$  and Hill coefficients,  $n_h$ ) were obtained from the curve fits of normalized concentration-response to the equation  $I_{\text{gly}} = I_{\text{max}} (\text{gly})^{n_h} / ((\text{gly})^{n_h} + (\text{EC}_{50})^{n_h})$ . The mean maximal current ( $I_{\text{max}}$ ) indicated the average maximal current elicited by a concentration of 1 mM glycine. All modulators were first dissolved in ethanol, DMSO, methanol or methyl-acetate and subsequently diluted into the recording solution on the day of the experiment. None of the vehicles produced discernable effects on the glycine-evoked currents. The drugs were co-applied with glycine, without pre-applications. EC effects were tested up to 10  $\mu\text{M}$  in order to avoid significant membrane-associated effects [48–49].

### cDNA Constructs

Mutations were inserted using the QuickChange™ site-directed mutagenesis kit (Stratagene, La Jolla, CA, USA) in cDNA constructs encoding GlyRs in a pCI vector (Promega, Madison, WI, USA) or pcDNA3 (Invitrogen, Carlsbad, CA, USA). All the constructions were confirmed by full sequencing. The procedures involved in the generation of the chimeric GlyRs have been previously published [17]. The GlyR amino acids were numbered according to their position in the mature protein sequence.

### Chemicals

All the drugs were obtained from Tocris Bioscience (Bristol, UK) or BioTrend AG (Zurich, CH). N-arachidonoyl-L-alanine (NALA), N-arachidonoyl-L-serine (NA-Ser) and arachidonic acid (AA) were purchased from Cayman Chemical (Ann Arbor, MI, USA).

### Data analysis

All values were expressed as mean  $\pm$  s.e.m of normalized glycine-activated currents. Statistical comparisons were performed using ANOVA.  $P < 0.05$  was considered statistically significant. For statistical analysis, at least 6 cells were analyzed. For all the statistical analysis and plots, MicroCal Origin 6.0 (Northampton, MA, USA) software was used.

### Supporting Information

**Figure S1 Endocannabinoid sensitivity of different GlyR subtypes.** Concentration-response curves for ECs in wild-type

### References

- Müller F, Heinke B, Sandkühler J (2003) Reduction of glycine receptor-mediated miniature inhibitory postsynaptic currents in rat spinal lamina I neurons after peripheral inflammation. *Neuroscience* 122: 799–805.
- Harvey RJ, Depner UB, Wässle H, Ahmadi S, Heindl C, et al. (2004) GlyR  $\alpha_3$ : an essential target for spinal PGE<sub>2</sub>-mediated inflammatory pain sensitization. *Science* 304: 884–887.
- Lynch JW (2004) Molecular structure and function of the glycine receptor chloride channel. *Physiol. Rev* 84: 1051–1095.
- Legendre P (2001) The glycinergic inhibitory synapse. *Cell. Mol. Life Sci* 58: 760–793.
- Bormann J, Rundström N, Betz H, Langosch D (1993) Residues within transmembrane segment M2 determine chloride conductance of glycine receptor homo- and hetero-oligomers. *EMBO J.* 12: 3729–3737.
- Mangin JM, Baloul M, Prado De Carvalho L, Rogister B, Rigo JM, et al. (2003) Kinetic properties of the  $\alpha_2$  homo-oligomeric glycine receptor impairs a proper synaptic functioning. *J Physiol* 553: 369–386.
- Zeilhofer HU (2005) The glycinergic control of spinal pain processing. *Cell. Mol. Life Sci* 62: 2027–2035.
- Lynch JW (2009) Native glycine receptor subtypes and their physiological roles. *Neuropharmacology* 56: 303–309.
- Xu TL, Gong N (2010) Glycine and glycine receptor signaling in hippocampal neurons: diversity, function and regulation. *Prog. Neurobiol* 91: 349–361.
- Yévenes GE, Zeilhofer HU (2011) Allosteric Modulation of Glycine Receptors. *Br J Pharmacol*, In press.
- Mihic SJ, Ye Q, Wick MJ, Koltchine VV, Krasowski MD, et al. (1997) Sites of alcohol and volatile anaesthetic action on GABA<sub>A</sub> and glycine receptors. *Nature* 389: 385–389.
- Harris RA, Trudell JR, Mihic SJ (2008) Ethanol's molecular targets. *Sci. Signal* 1: re7.
- Smart TG, Hosie AM, Miller PS (2004) Zinc ions: modulators of excitatory and inhibitory synaptic activity. *Neuroscientist* 10: 432–442.
- Miller PS, Topf M, Smart TG (2008) Mapping a molecular link between allosteric inhibition and activation of the glycine receptor. *Nat. Struct. Mol. Biol* 15: 1084–1093.
- Mascia MP, Mihic SJ, Valenzuela CF, Schofield PR, Harris RA (1996) A single amino acid determines differences in ethanol actions on strychninesensitive glycine receptors. *Mol. Pharmacol* 50: 402–406.
- Miller PS, Da Silva HM, Smart TG (2005) Molecular basis for zinc potentiation at strychnine-sensitive glycine receptors. *J. Biol. Chem* 280: 37877–37884.

$\alpha_1$ ,  $\alpha_2$  and  $\alpha_3$  GlyRs. Membrane currents were activated by equipotent ( $\text{EC}_{10}$ ) glycine concentrations. Chemical structures for the ligands are also shown. NOLE, noladin ether; AEA, anandamide; NA-5HT, arachidonyl serotonin; NADA, N-arachidonyl dopamine, NA-Gly; N-arachidonyl glycine; NA-GABA, N-arachidonyl-GABA; NA-Ser, N-arachidonoyl-L-serine; NALA, N-arachidonoyl-L-alanine; AA, arachidonic acid; VIR, virodhamine. Data are means  $\pm$  SEM from 6–15 cells.

(TIF)

**Figure S2 Concentration-response curves for NA-Gly on wild-type GlyR subunits at different glycine concentrations.** Glycine-evoked currents were activated by glycine at  $\text{EC}_{10}$  or  $\text{EC}_{50}$  concentrations and then tested in the presence of NA-Gly. These values were calculated from experimental concentration-response curves (Table 1). Note that the effects of NA-Gly on  $\alpha_1$  GlyRs were significantly attenuated at a higher glycine concentration, whereas the inhibitory actions of NA-Gly on  $\alpha_2$  and  $\alpha_3$  GlyRs were unaffected.

(TIF)

**Figure S3 The potentiation elicited by NA-Gly on the triple mutated  $\alpha_2$  T59A/A261G/A303S GlyRs also require a lysine residue within the large intracellular loop.**

(A) Schematic depiction of wild type and mutated  $\alpha_2$  GlyRs. (B) Concentration-response curves of the normalized glycine-activated currents elicited in wild-type and triple or quadruple mutated  $\alpha_2$  GlyRs to different concentrations of NA-Gly using an  $\text{EC}_{10}$  or an  $\text{EC}_{50}$  of glycine. Three simultaneous reverse mutations in  $\alpha_2$  GlyR converted NA-Gly into an allosteric potentiator. This current enhancement was significantly attenuated by the mutation of a conserved lysine residue in the large intracellular loop (K385A).

(TIF)

### Acknowledgments

The authors thank Thomas Grampp and Karin Breu for their technical assistance. We also thank Dr. Luis G. Aguayo and Dr. Gustavo Moraga-Cid (University of Concepcion, Chile) for providing some GlyR mutants plasmids.

### Author Contributions

Conceived and designed the experiments: GEY HUZ. Performed the experiments: GEY. Analyzed the data: GEY HUZ. Wrote the paper: GEY HUZ.

17. Yévenes GE, Moraga-Cid G, Avila A, Guzmán L, Figueroa M, et al. (2010) Molecular requirements for ethanol differential allosteric modulation of glycine receptors based on selective G $\beta\gamma$  modulation. *J. Biol. Chem* 285: 30203–30213.
18. Lozovaya N, Yatsenko N, Beketov A, Tsintsadze T, Burnashev N (2005) Glycine receptors in CNS neurons as a target for non-retrograde action of cannabinoids. *J. Neurosci* 25: 7499–7506.
19. Hejazi N, Zhou C, Oz M, Sun H, Ye JH, et al. (2006) Delta<sup>9</sup>-tetrahydrocannabinol and endogenous cannabinoid anandamide directly potentiate the function of glycine receptors. *Mol. Pharmacol* 69: 991–997.
20. Yang Z, Aubrey KR, Alroy I, Harvey RJ, Vandenberg RJ, et al. (2008) Subunit-specific modulation of glycine receptors by cannabinoids and N-arachidonyl-glycine. *Biochem. Pharmacol* 76: 1014–1023.
21. Piomelli D (2003) The molecular logic of endocannabinoid signaling. *Nat. Rev. Neurosci* 4: 873–884.
22. Huang SM, Bisogno T, Petros TJ, Chang SY, Zavitsanos PA, et al. (2001) Identification of a new class of molecules, the arachidonyl amino acids, and characterization of one member that inhibits pain. *J. Biol. Chem* 276: 42639–42644.
23. Wiles AL, Pearlman RJ, Rosvall M, Aubrey KR, Vandenberg RJ (2006) N-Arachidonyl-glycine inhibits the glycine transporter, GLYT2a. *J. Neurochem* 99: 781–786.
24. Maione S, De Petrocellis L, de Novellis V, Moriello AS, Petrosino S, et al. (2007) Analgesic actions of N-arachidonyl-serotonin, a fatty acid amide hydrolase inhibitor with antagonistic activity at vanilloid TRPV1 receptors. *Br. J. Pharmacol* 150: 766–781.
25. Guo J, Williams DJ, Ikeda SR (2008) N-arachidonoyl L-serine, a putative endocannabinoid, alters the activation of N-type Ca<sup>2+</sup> channels in sympathetic neurons. *J. Neurophysiol* 100: 1147–1151.
26. Belelli D, Lambert JJ (2005) Neurosteroids: endogenous regulators of the GABA<sub>A</sub> receptor. *Nat. Rev. Neurosci* 6: 565–575.
27. Miller PS, Smart TG (2010) Binding, activation and modulation of Cys-loop receptors. *Trends Pharmacol. Sci* 31: 161–174.
28. Foadi N, Leuwer M, Demir R, Dengler R, Buchholz V, et al. (2010) Lack of positive allosteric modulation of mutated  $\alpha_1$  S267I glycine receptors by cannabinoids. *Naunyn Schmiedeberg's Arch Pharmacol* 381: 477–482.
29. Xiong W, Cheng K, Cui T, Godlewski G, Rice KC, et al. (2011) Cannabinoid potentiation of glycine receptors contributes to cannabis-induced analgesia. *Nat Chem Biol* 7: 296–303.
30. Brejc K, van Dijk WJ, Klaassen RV, Schuurmans M, van Der Oost J, et al. (2001) Crystal structure of an ACh-binding protein reveals the ligand-binding domain of nicotinic receptors. *Nature* 411: 269–276.
31. Lape R, Colquhoun D, Sivilotti LG (2008) On the nature of partial agonism in the nicotinic receptor superfamily. *Nature* 454: 722–727.
32. Pless SA, Lynch JW (2009) Magnitude of a conformational change in the glycine receptor  $\beta$ 1- $\beta$ 2 loop is correlated with agonist efficacy. *J. Biol. Chem* 284: 27370–27376.
33. Plested AJ, Groot-Kormelink PJ, Colquhoun D, Sivilotti LG (2007) Single-channel study of the spasmodic mutation  $\alpha_1$  A52S in recombinant rat glycine receptors. *J. Physiol* 581: 51–73.
34. Peters JA, Hales TG, Lambert JJ (2005) Molecular determinants of single-channel conductance and ion selectivity in the Cys-loop family: insights from the 5-HT3 receptor. *Trends Pharmacol. Sci* 26: 587–594.
35. Yévenes GE, Moraga-Cid G, Guzmán L, Haeger S, Oliveira L, et al. (2006) Molecular determinants for G protein  $\beta\gamma$  modulation of ionotropic glycine receptors. *J. Biol. Chem.* 281: 39300–39007.
36. Yévenes GE, Moraga-Cid G, Peoples RW, Schmalzing G, Aguayo LG (2008) A selective G $\beta\gamma$ -linked intracellular mechanism for modulation of a ligand gated ion channel by ethanol. *PNAS* 105: 20523–20528.
37. Oz M (2006) Receptor-independent actions of cannabinoids on cell membranes: focus on endocannabinoids. *Pharmacol. Ther* 111: 114–144.
38. Zhang L, Xiong W (2009) Modulation of the Cys-loop ligand-gated ion channels by fatty acid and cannabinoids. *Vitam. Horm* 81: 315–335.
39. Büttner C, Sädler S, Leyendecker A, Laube B, Griffon N, et al. (2001) Ubiquitination precedes internalization and proteolytic cleavage of plasma membrane-bound glycine receptors. *J. Biol. Chem.* 276: 42978–42985.
40. Arancibia-Cárcamo IL, Yuen EY, Muir J, Lumb MJ, Michels G, et al. (2009) Ubiquitin-dependent lysosomal targeting of GABA<sub>A</sub> receptors regulates neuronal inhibition. *PNAS* 106: 17552–17557.
41. Hillard CJ, Jarrarian A (2003) Cellular accumulation of anandamide: consensus and controversy. *Br. J. Pharmacol* 140: 802–808.
42. Suplita RL, Gutierrez T, Fegley D, Piomelli D, Hohmann AG (2006) Endocannabinoids at the spinal level regulate, but do not mediate, nonopioid stress-induced analgesia. *Neuropharmacology* 50: 372–379.
43. Pernía-Andrade AJ, Kato A, Witschi R, Nyilas R, Katona I, et al. (2009) Spinal endocannabinoids and CB1 receptors mediate C-fiber-induced heterosynaptic pain sensitization. *Science* 325: 760–764.
44. Garcia-Ovejero D, Arevalo-Martín A, Petrosino S, Docagne F, Hagen C, et al. (2009) The endocannabinoid system is modulated in response to spinal cord injury in rats. *Neurobiol. Dis* 33: 57–71.
45. Bocquet N, Nury H, Baaden M, Le Poupon C, Changeux JP, et al. (2009) X-ray structure of a pentameric ligand-gated ion channel in an apparently open conformation. *Nature* 457: 111–114.
46. Baenziger JE, Corringer PJ (2010) 3D structure and allosteric modulation of the transmembrane domain of pentameric ligand-gated ion channels. *Neuropharmacology* 60: 116–125.
47. Makriyannis A, Tian X, Guo J (2005) How lipophilic cannabinergic ligands reach their receptor sites. *Prostaglandins Other Lipid Mediat* 77: 210–218.
48. Bruno MJ, Koeppe RE 2nd, Andersen OS (2007) Docosahexaenoic acid alters bilayer elastic properties. *PNAS* 104: 9638–9643.
49. Lundbaek JA (2008) Lipid bilayer-mediated regulation of ion channel function by amphiphilic drugs. *J Gen Physiol* 131: 421–429.
